# Supplementary material for: CCAAT/enhancer-binding protein delta promotes intracellular lipid accumulation in M1 macrophages of vascular lesions
Source: Oxford University Press journal article supplement (doi:10.1093/cvr/cvx134), 2017-07-09
Supplement: cvx134_Cardiovascular_Research-supplementary.doc [file cvx134_Cardiovascular_Research-supplementary.doc]

**Supplementary materials and methods**

***Materials***

SB203580 (p38MAPK inhibitor), AS605240 (macropinocytosis inhibitor), probucol (ABCA1 inhibitor), PMA, LPS, and PGE2 were purchased from Sigma (St. Louis, MO, USA). IL-4 and IL-13 were purchased from Cell Guidance Systems (Babraham, Cambridge, UK). Simvastatin was purchased from Merck (Darmstadt, Germany). RPMI-1640 and FBS were purchased from HyClone Laboratories (Logan, UT, USA). The TRIzol® RNA extraction reagent, SuperScript® III reverse transcriptase, DMEM, and Opti-MEM were purchased from Invitrogen (Carlsbad, CA, USA). The SYBR® Premix Ex TaqTM kit was purchased from Takara (Otsu, Shiga, Japan). The *Trans*IT®-2020 transfection reagent was purchased from Mirus Bio LLC (Madison, WI, USA). All oligonucleotides were synthesized by MDBio, Inc. (Taipei, Taiwan).

***Reagents and inhibitors***

Unless otherwise specified, the following concentrations of reagents and inhibitors were used in this study: oxLDL, 50 µg/mL; acLDL, 50 µg/mL; SB203580, 10 µM; probucol, 10 µM; simvastatin, 10 µM.

***LDL modification***

The oxLDL was prepared as described previously1. Briefly, LDL (Sigma, St. Louis, MO, USA) was exposed to 10 µmol/L CuSO4 for 24 hours at 37°C, and then oxidation was terminated by adding EDTA (pH 8.0) to a final concentration of 200 µM. The extent of oxidation was determined by measurement of thiobarbituric acid-reactive substances (TBARS). The oxLDL containing approximately 30-60 nmol TBARS defined as malondialdehyde (MDA) equivalents per milligram of LDL was used for experiments. AcLDL was directly purchased from Alfa Aesar (Heysham, Lancashire, UK).

***Immunohistochemistry (IHC) staining***

The aortae of experimental animals were perfused with PBS and 4% paraformaldehyde. For atherosclerotic lesion analysis, serial cryosections of 5 µm thickness were taken from the region of the proximal ascending aortae and stained with Oil Red O and hematoxylin2. The lesion areas in cross-sections of the proximal ascending aortae of these mice were defined as Oil Red O-positive areas.

***Oil Red O staining***

Cells were fixed with 3.7% formaldehyde for 30 minutes and then washed by 60% isopropanol. Next, cells were stained with Oil Red O working solution (0.5% Oil Red O stock in isopropanol : H2O = 3 : 2) for 1 hour and then washed by H2O. Hematoxylin was used for counterstaining. The density of lipid content was evaluated by isopropanol extraction after Oil Red O staining. The absorbance at 510 nm was measured with iMarkTM microplate reader (Bio-Rad, Hercules, CA, USA).

***Next generation sequencing (NGS) analysis***

Total RNAs were isolated using TRIzol® RNA extraction reagent. Sequencing libraries were generated from the rRNA-depleted RNAs using SOLiDTM Total RNA-Seq Kit (Thermo Fisher Scientific) following the manufacturer’s instructions. Sequencing libraries were subsequently sequenced using the 5500xl SOLiDTM system (Applied Biosystems). Cufflinks was then used to align RNA-Seq reads, assemble transcriptome, and detect differentially expressed genes. Good quality signals were obtained by filtering for scores of *p*-value ≤ 0.01 and more than 1.5-fold change. Finally, the function of candidate genes was assigned by database for annotation, visualization, and integrated discovery (DAVID) [National Institute of Allergy and Infectious Diseases (NIAID), NIH].

***Reverse transcription-quantitative polymerase chain reaction (RT-qPCR)***

Total RNAs were isolated using TRIzol® RNA extraction reagent and then converted to cDNA by SuperScript® III reverse transcriptase. Specific primers for traditional PCR were shown in **Supplementary Table 2**. The PCR products were separated by electrophoresis in 1% agarose gels and visualized with ethidium bromide staining. For quantitative PCR, the cDNA was mixed with SYBR® Premix Ex TaqTM kit and appropriate primers, and quantitative PCR was performed with C1000TM Thermal Cycler (Bio-Rad, Hercules, CA, USA). Specific primers for quantitative PCR were shown in **Supplementary Table 2**. Forty cycles were set for quantitative PCR program, and the abundances of interested gene expression were calculated following the formula (2-ΔΔCt).

***Construction of plasmids***

The *CEBPD* and *PTX3* reporters were established in previous studies3, 4. The 5′-flanking region of *ABCA1* gene was cloned by PCR of genomic DNA from THP-1 cells with specific primers: *ABCA1*/-1075, 5’-*Kpn*I-TTCTACGGGTCTGTCCTGAG-3’ and *ABCA1*/+33, 5’-*Hind*III-ACTATCGGTCAAAGCCTGTG-3’. The promoter fragment generated by PCR was digested with *Kpn*I and *Hind*III and inserted into the promoterless pGL3-basic vector (Promega, Madison, WI, USA) for further reporter assay. The plasmids expressing DN-p38α, MKK3Ac, MKK6Ac, and DN-CREB were obtained from previous study3. To produce CEBPD expression vector, the CDS fragment generated by PCR was digested with *BamH*I and *Xho*I and inserted into the pEGFP-C1 expression vector. The zinc-inducible CEBPD expression vector, pMT/HA-CEBPD, was constructed by cloning CEBPD complementary DNA (cDNA) with *BamH*I and *Hind*III into the pMT/CB6+ vector (a gift from Dr. Sigal Gery, Cedars-Sinai Medical Center, Los Angeles, CA, USA ).

***Plasmid transfection and reporter assay***

THP-1 cells were transfected with plasmids using *Trans*IT®-2020 transfection reagent according to the manufacturer’s instructions. The total amount of DNA for each experiment was matched to their individual backbone vector. After transfection for 16 hours, the lysates of experimental cells were harvested for luciferase assay system (Promega, Madison, WI, USA) following the manufacturer’s instructions.

***Western blot analysis***

Cells were lysed in modified RIPA buffer containing 50 mM Tris-HCl (pH 7.4), 150 mM NaCl, 1 mM EDTA, 1% NP-40, 0.25% sodium deoxycholate, 100 µg/mL PMSF, 1 µg/mL aprotinin, 1 µg/mL leupeptin, 5 µM NaF, and 1 mM Na3VO4. The lysates were resolved on sodium dodecyl sulfate (SDS)-containing 10% polyacrylamide gels, transferred to polyvinylidene difluoride (PVDF) nylon membranes, and probed with specific antibodies at 4°C overnight. Specific antibodies for Western blot analysis were shown in **Supplementary Table 3**. The levels of interested proteins were detected by horseradish peroxidase (HRP)-conjugated antibodies and revealed by an enhanced chemiluminescence (ECL) Western blot system (Pierce, Rockford, IL, USA).

***Lentiviral knockdown assay***

Virus was produced from Phoenix-AMPHO cells by co-transfection of various small hairpin RNA (shRNA) expression vectors in combination with pMD2.G and psPAX2. After determining the viral infection efficiency, 10 multiplicity of infection (MOI) of lentivirus containing shβ-galactosidase (shLacZ), shCEBPD, or shPtx3 was used to infect THP-1 cells or mouse primary macrophages for 48 hours. In all lentiviral experiments, medium containing any viruses that had not infected the Phoenix-AMPHO cells was removed before conducting further assays. The shRNA sequences in lentiviral expression vectors were shown as follows: shLacZ, 5’- CCGGTGTTCGCATTATCCGAACCATCTCGAGATGGTTCGGATAATGCGAACATTTTTG-3’, shCEBPD, 5’- CCGGGCCGACCTCTTCAACAGCAATCTCGAGATTGCTGTTGAAGAGGTCGGCTTTTT-3’, shPtx3#A, 5’- CCGGCGAGCTCATGTATGTGAATTTCTCGAGAAATTCACATACATGAGCTCGTTTTTG-3’, and shPtx3#C, 5’-CCGGCAATTCTCTTCCCAATGCGTTCTCGAGAACGCATTGGGAAGAGAATTGTTTTTG-3’. The lentiviral knockdown expression vectors were purchased from the National RNAi Core Facility located at the Genomic Research Center of Institute of Molecular Biology, Academia Sinica (Taiwan).

***Production of recombinant proteins***

The plasmid containing a tobacco etch virus (TEV) protease cleavage site between an N-terminal 6xHistidine (His) tag and the *PTX3* gene was used in the production of recombinant proteins. The plasmid was transformed into competent DH10BacTM cells (Invitrogen) and then transfected High FiveTM insect cells (Invitrogen) according to the manufacturer’s instructions. The recombinant baculovirus particles were then prepared and amplified to infect insect cells for expression of recombinant proteins. The recombinant proteins were purified by nickel affinity and gel filtration chromatography.

***Generation of D360-Luc transgenic mice and genotyping***

The transgene of *D360-Luc* including the *CEBPD* gene promoter (-347/+9) and *Luciferase* gene was used in the generation of transgenic mice. All animal procedures performed in this study were approved by the Institutional Animal Care and Use Committee (IACUC) of National Cheng Kung University (NCKU). In order to perform super-ovulation, 4-week-old female FVB mice received an intraperitoneal (IP) injection of 5 IU pregnant mare serum gonadotropin (PMSG) (Sigma, St. Louis, MO, USA) followed by an IP injection of 5 IU human chorionic gonadotropin (hCG) (Sigma, St. Louis, MO, USA) at 48 hours after PMSG injection. These injected mice were mated with male FVB mice and then killed at 18 hours after hCG injection for the collection of fertilized oocytes. Pronuclear DNA microinjection followed the protocol as described previously (Hogan B, Manipulating the mouse embryo: a laboratory manual, Cold Spring Harbor). Briefly, 2 ng/μL purified *D360-Luc* DNA was injected into each pronucleus of fertilized oocytes via a micromanipulation system (Eppendorf) under a DM IRB inverted microscope (Leica). The injected zygotes were transferred into the oviducts of pseudopregnant female mice which then carried to term. Mouse tail snips were collected from pups at 10-14 days after birth for genomic DNA extraction and then subjected to genotyping via PCR detection5. To detect the *D360-Luc* gene, forward primer (5’-GATTAAGTACAAAGGCTATCAGGT-3’) and reverse primer (5’-TAGCGTAAAAGGAGCAACATAGT-3’) were used for PCR amplification, and the expected PCR product was 431 bp.

**Supplementary references**

1. Lu KY, Ching LC, Su KH, Yu YB, Kou YR, Hsiao SH, Huang YC, Chen CY, Cheng LC, Pan CC, Lee TS. Erythropoietin suppresses the formation of macrophage foam cells: role of liver X receptor alpha. Circulation 2010;**121**(16):1828-37.

2. Ding L, Biswas S, Morton RE, Smith JD, Hay N, Byzova TV, Febbraio M, Podrez EA. Akt3 deficiency in macrophages promotes foam cell formation and atherosclerosis in mice. Cell Metab 2012;**15**(6):861-72.

3. Wang JM, Tseng JT, Chang WC. Induction of human NF-IL6beta by epidermal growth factor is mediated through the p38 signaling pathway and cAMP response element-binding protein activation in A431 cells. Mol Biol Cell 2005;**16**(7):3365-76.

4. Ko CY, Chang LH, Lee YC, Sterneck E, Cheng CP, Chen SH, Huang AM, Tseng JT, Wang JM. CCAAT/enhancer binding protein delta (CEBPD) elevating PTX3 expression inhibits macrophage-mediated phagocytosis of dying neuron cells. Neurobiol Aging 2012;**33**(2):422.e11-25.

5. Cheng PH, Li CL, Her LS, Chang YF, Chan AW, Chen CM, Yang SH. Significantly differential diffusion of neuropathological aggregates in the brain of transgenic mice carrying N-terminal mutant huntingtin fused with green fluorescent protein. Brain Struct Funct 2013;**218**(1):283-94.

**Supplementary figure legends**

**Supplementary Figure 1. The transcription of the human *CEBPD* gene is activated in both M1 and M2 macrophages.** (A) PMA-differentiated THP1 macrophages (2 x 105/ml) were treated with or without LPS (100 ng/mL) or IL-4/IL-13 (20 ng/mL). Total RNA was harvested for RT-qPCR assays. Experiments were repeated three times. Statistical significance was determined using Kruskal-Wallis test followed by Dunn’s *post-hoc* test for multiple comparisons.

**Supplementary Figure 2. Verification of macrophage polarization.** (A) Monocytes were isolated from the bone marrow of WT mice and polarized into M1 or M2 macrophages (n=3). Total RNA was harvested for RT-qPCR assays. Statistical significance was determined using Mann-Whitney test.

**Supplementary Figure 3. The loss of CEBPD reduces *PTX3* transcripts and increases *ABCA1* transcripts in mouse and THP-1 M1 macrophages.** (A) WT and *Cebpd*-/- M1 macrophages (2 x 105/ml) were treated with oxLDL (50 µg/mL) at the indicated time points (n=3). Total RNA was harvested for RT-qPCR assays. (B) THP-1 cells were pre-infected with lentiviruses encoding shLacZ or shCEBPD and then differentiated into M1 macrophages (2 x 105/ml) (n=3). Total RNA was harvested for RT-qPCR assays. (C) THP-1 cells were pre-infected with lentiviruses encoding shLacZ or shCEBPD and then differentiated into M1 macrophages (2 x 105/ml) (n=3). Total RNA was harvested for RT-qPCR assays. Statistical significance was determined using Mann-Whitney test.

**Supplementary Figure 4. PTX3 promotes lipid accumulation through macropinocytosis in mouse M1 macrophages.** (A) Mouse M1 macrophages (2 x 105/ml) were pre-infected with lentiviruses encoding shLacZ or shPtx3 and then treated with oxLDL (50 µg/mL) or acLDL (50 µg/mL) for 3 days. The macrophages were then subjected to Oil Red O stainings. Images are representative of five independent experiments (scale bar: 5 µm). (B) Mouse M1 macrophages (2 x 105/ml) were pre-treated with or without macropinocytosis inhibitor AS605240 (1 µM), either alone or in combination with bvPTX3 (0.125 µg/mL). The macrophages were then treated with oxLDL (50 µg/mL) or acLDL (50 µg/mL) for 3 days and subjected to Oil Red O stainings. Images are representative of five independent experiments (scale bar: 5 µm). Statistical significance was determined using Kruskal-Wallis test followed by Dunn’s *post-hoc* test for multiple comparisons.

**Supplementary Figure 5. Simvastatin attenuates lipid accumulation in mouse M1 macrophages.** (A) Following pre-treatment with or without simvastatin (10 µM), mouse M1 macrophages (2 x 105/ml) were then treated with oxLDL or acLDL. Total RNA and whole cell lysates were harvested for RT-qPCR assays and Western blot analyses, respectively. Images are representative of three independent experiments. (B) Mouse M1 macrophages (2 x 105/ml) were pre-treated with or without simvastatin (10 µM) and then treated with oxLDL (50 µg/mL) or acLDL (50 µg/mL) for 2 days. The macrophages were then subjected to Oil Red O stainings. Images are representative of five independent experiments (scale bar: 5 µm). Statistical significance was determined using Mann-Whitney test.

**Supplementary Figure 6. PTX3 suppresses ABCA1 expression and reduces cholesterol efflux in M1 macrophages.** (A) THP-1 cells were pre-infected with lentiviruses encoding shLacZ or shCEBPD and then differentiated into M1 macrophages. The macrophages (2 x 105/ml) were then treated with or without probucol (10 µM) or bvPTX3 (0.125 µg/mL) followed by treatment with or without oxLDL (50 µg/mL). Whole cell lysates were harvested for Western blot analyses. Images are representative of three independent experiments. (B) Following labeling with medium containing oxLDL and BODIPY-cholesterol, WT and *Cebpd*-/- M1 macrophages (2 x 105/ml) were pre-treated with or without probucol (10 µM), bvPTX3 (0.125 µg/mL), or probucol (10 µM) combined with bvPTX3 (0.125 µg/mL). The macrophages were then treated with APOA1 used as a cholesterol acceptor (n=5). Statistical significance was determined using Kruskal-Wallis test followed by Dunn’s *post-hoc* test for multiple comparisons.

**Supplementary tables**

**Supplementary Table 1. Genes in response to Cebpd in mouse M1 macrophages.**

| **Up-regulation** | | **Down-regulation** | |
| --- | --- | --- | --- |
| **Names** | **Folds** | **Names** | **Folds** |
| Ahsa1 | 2.84 | Itgax | 0.02 |
| Lst1 | 2.87 | Mamdc2 | 0.03 |
| Ptx3 | 2.96 | F7 | 0.03 |
| Rapgef5 | 2.97 | Mmp12 | 0.07 |
| Hp | 3.01 | Atp6v0d2 | 0.07 |
| Lcn2 | 3.02 | Ddit4 | 0.09 |
| Iigp1 | 3.03 | Col6a3 | 0.09 |
| Cdk1 | 3.06 | Qpct | 0.11 |
| Serpinb6b | 3.09 | Ranbp1 | 0.11 |
| Hist1h3i | 3.12 | Large | 0.12 |
| Cd69 | 3.12 | Ctsf | 0.14 |
| Mcm6 | 3.16 | Gpnmb | 0.15 |
| Hist2h2aa1_dup1 | 3.17 | Mgp | 0.15 |
| Gm5150 | 3.18 | Fzd7 | 0.15 |
| Hist2h2aa1_dup2 | 3.19 | Ephx1 | 0.16 |
| Coro1a | 3.21 | Mfge8 | 0.17 |
| Atp5e | 3.33 | Clec7a | 0.17 |
| Hmgb2 | 3.34 | F10 | 0.18 |
| Ccl7 | 3.39 | Pdpn | 0.18 |
| Cd38 | 3.40 | Abca9 | 0.18 |
| Hist1h1b | 3.48 | Sema7a | 0.19 |
| 2810417H13Rik | 3.48 | Rnf128 | 0.19 |
| Ccl22 | 3.51 | Klf10 | 0.19 |
| Phf11 | 3.52 | Abca1 | 0.20 |
| Ifi44 | 3.57 | Il11ra1 | 0.20 |
| S100a9 | 3.62 | Trf | 0.21 |
| Racgap1 | 3.63 | Igsf8 | 0.21 |
| Cd5l | 3.74 | Sel1l3 | 0.22 |
| Saa3 | 3.78 | Pltp | 0.23 |
| Hist1h2ag | 3.83 | Rhob | 0.23 |
| Pydc4 | 3.83 | Hmga2 | 0.24 |
| Ngp | 3.86 | Fabp5 | 0.24 |
| Lsp1 | 4.03 | Acp5 | 0.24 |
| Spic | 4.05 | Zfp36l2 | 0.25 |
| C3 | 4.08 | Gstm1 | 0.26 |
| Bst2 | 4.09 | Hvcn1 | 0.26 |
| Hist1h3h | 4.30 | Plk2 | 0.26 |
| Tagap | 4.34 | Mmp19 | 0.27 |
| Hist2h2bb | 4.50 | Procr | 0.27 |
| Il6 | 4.56 | Fam198b | 0.27 |
| Rnf149 | 4.62 | Col6a1 | 0.28 |
| Aif1 | 4.69 | Man2b1 | 0.28 |
| Gbp6 | 4.70 | Trpm3 | 0.28 |
| Slamf9 | 4.83 | Angptl4 | 0.28 |
| Chi3l3 | 5.12 | Hilpda | 0.28 |
| Ly6c2 | 5.41 | Chst11 | 0.28 |
| Ly6e | 5.62 | Cd9 | 0.29 |
| Hist2h3c2-ps | 5.79 | Timp3 | 0.29 |
| St3gal5 | 5.91 | Cxcl1 | 0.30 |
| Chi3l1 | 7.01 | Rhoc | 0.30 |
| Fgl2 | 7.19 | Dhrs9 | 0.30 |
| Ifnb1 | 8.78 | Gpc1 | 0.30 |
| Ms4a4c | 10.09 | Cd200 | 0.31 |
| Sell | 10.39 | Btg1 | 0.31 |
| Apol9a | 12.66 | Cd200r4 | 0.31 |
| Cd55 | 15.53 | Loxl2 | 0.31 |
| Plac8 | 15.82 | Sepp1 | 0.31 |
| Fpr1 | 16.23 | Irf8 | 0.31 |
| Parp11 | 24.58 | Igf2r | 0.31 |
| Gtse1 | 2666.27 | Cx3cl1 | 0.31 |

**Supplementary Table 2. Specific primers for quantitative PCR.**

| **Accession** | **Gene** | **Forward primer**  **(5’ → 3’)** | **Reverse primer**  **(5’ → 3’)** |
| --- | --- | --- | --- |
| NM_007679.4 | m-*Cebpd* | GCCATGTACGACGACGAGAG | TGTGATTGCTGTTGAAGAGGTC |
| NM_008987.3 | m-*Ptx3* | AGTTGAAGGGAAGGCTTGAG | TGAACAATGGGCAACAGAGC |
| NM_013454.3 | m-*Abca1* | CAACTTTTACGAAGGCCAGA | CAGTCAGCATGTCAAACAGC |
| NM_005195.3 | h-*CEBPD* | ACTCAGCAACGACCCATACC | CGCTCCTATGTCCCAAGAAA |
| NM_002852.3 | h-*PTX3* | GGCAGGTTGTGAAACAGCTA | GCCATAGGAAAACAGGATGG |
| NM_138715.2 | h-*SR-A* | GACATGGAAGCCAACCTCAT | GTTGAGCTGCAAATCAAGCA |
| NM_000072.3 | h-*CD36* | ACAGATGCAGCCTCATTTCC | TGGGTTTTCAACTGGAGAGG |
| NM_005502.3 | h-*ABCA1* | AACAGTTTGTGGCCCTTTTG | AAGTTCCAGGCTGGGGTACT |
| NM_207627.1 | h-*ABCG1* | ACTCCGGCTTCCTCTTCTTC | CATGGTCTTGGCCAGGTAGT |
| NM_005505.4 | h-*SR-BI* | CTGTGGGTGAGATCATGTGG | GAGGTGGATCCTGCTGATGT |
| NM_002046.5 | h-*GAPDH* | CCACCCAGAAGACTGTGGAT | TTCAGCTCAGGGATGACCTT |

**Supplementary Table 3. Specific antibodies for Western blot analysis.**

| **Protein** | **Molecular weight**  **(kDa)** | **Source** | **Catalog** | **Company** |
| --- | --- | --- | --- | --- |
| p38 | 43 | Rabbit | #9212 | Cell Signaling Technology |
| phospho-p38 | 43 | Rabbit | #9211 | Cell Signaling Technology |
| CREB | 43 | Rabbit | sc-186 | Santa Cruz Biotechnology |
| phospho-CREB | 43 | Rabbit | #9191 | Cell Signaling Technology |
| CEBPD | 28 | Rabbit | sc-636 | Santa Cruz Biotechnology |
| PTX3 | 42 | Rat | ab90806 | Abcam |
| PPARγ | 54 | Rabbit | ab45278 | Abcam |
| ABCA1 | 220 | Rabbit | GTX27360 | GeneTex |
| α-Tubulin | 50 | Mouse | T6199 | Sigma-Aldrich |
| p84 | 84 | Mouse | GTX70220 | GeneTex |
