# Supplementary material for: CCAAT/enhancer-binding protein delta promotes intracellular lipid accumulation in M1 macrophages of vascular lesions
Source: Oxford University Press journal article supplement (doi:10.1093/cvr/cvx134), 2017-07-09
Supplement: cvx134_Supplementary_figures-2(CVR-2016-802R4).pdf [file cvx134_Supplementary_figures-2(CVR-2016-802R4).pdf]

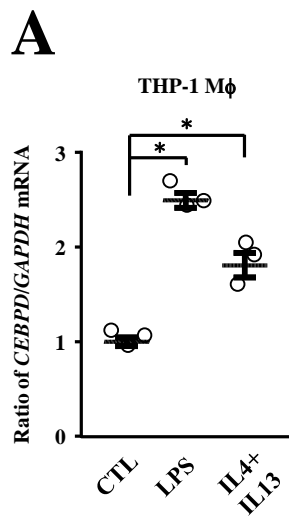

**Supplementary Figure 1**

**A**

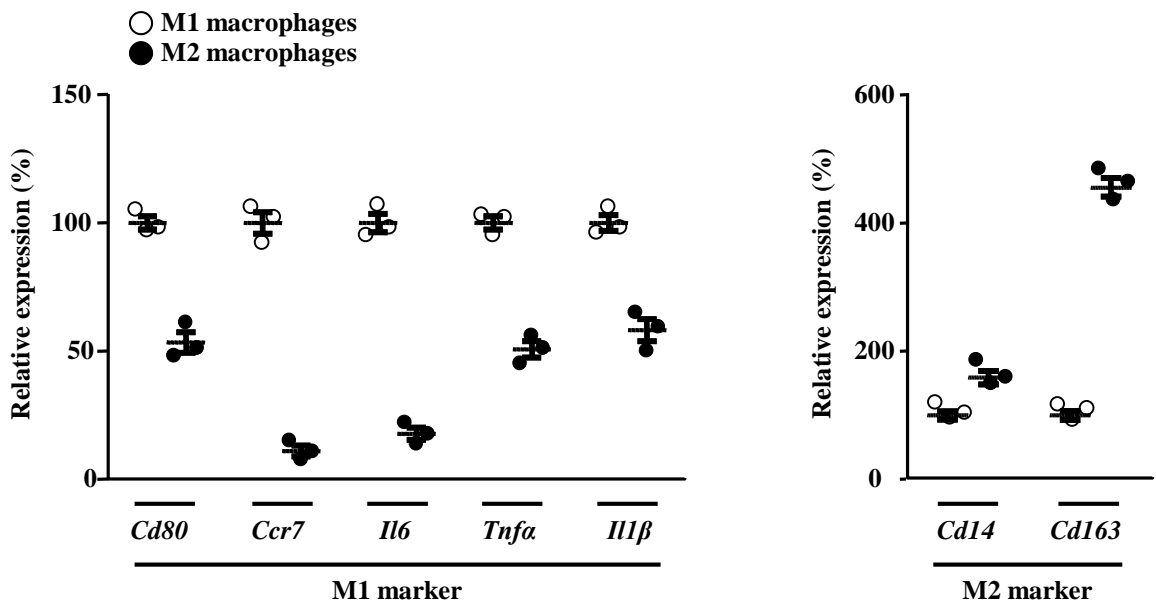

**Supplementary Figure 2**

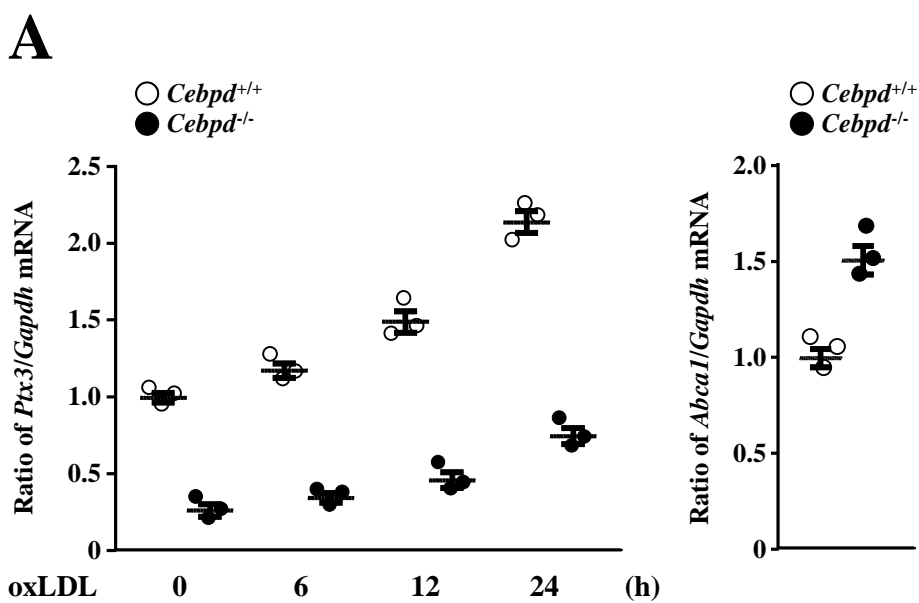

**B**

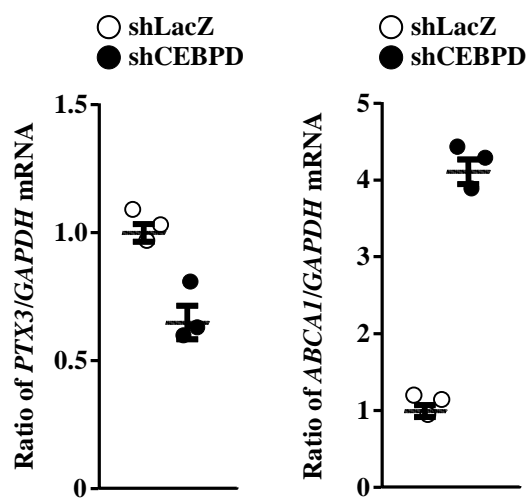

**C**

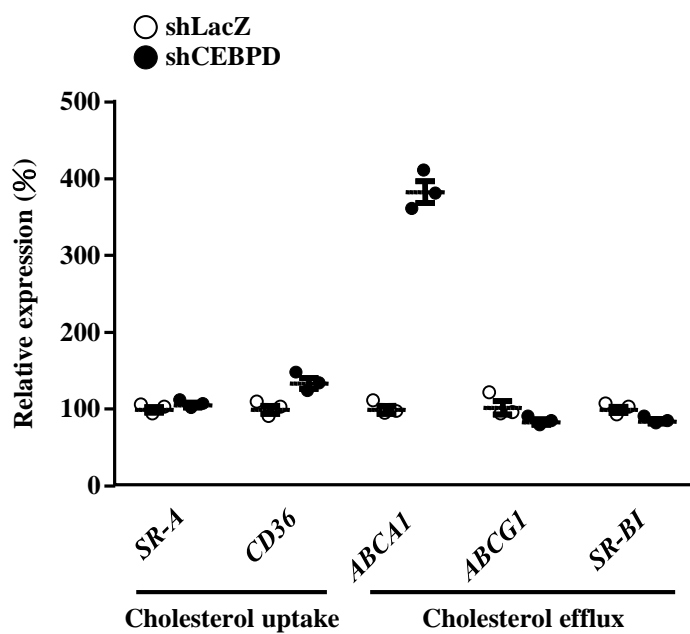

**Supplementary Figure 3**

**A***Cebpd*<sup>+/+</sup>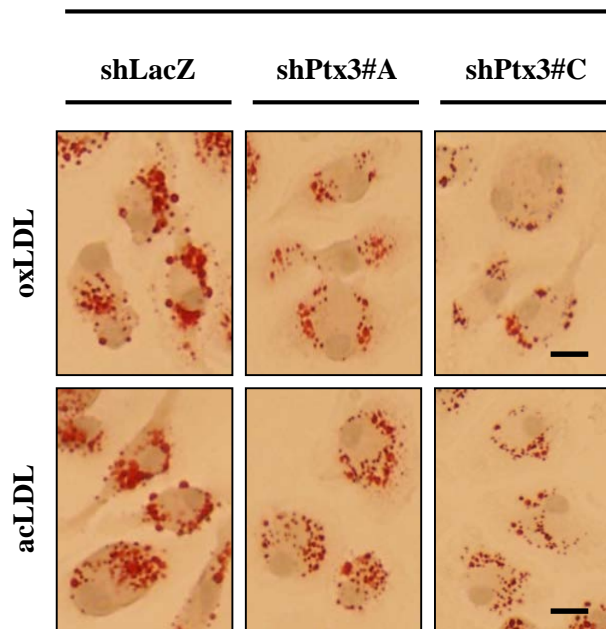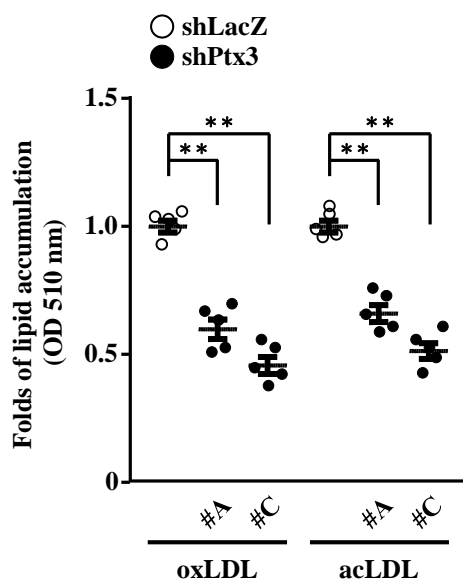**B***Cebpd*<sup>+/+</sup>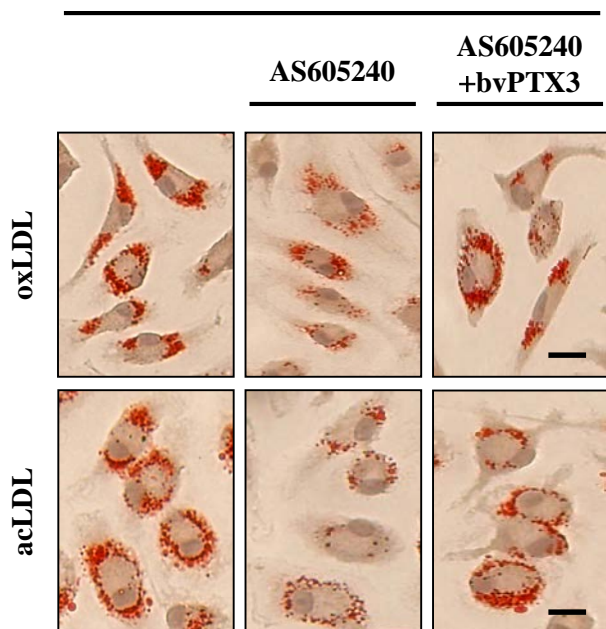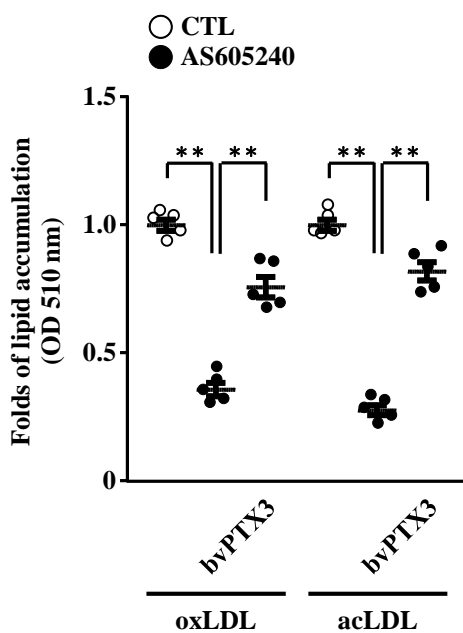**Supplementary Figure 4**

**A**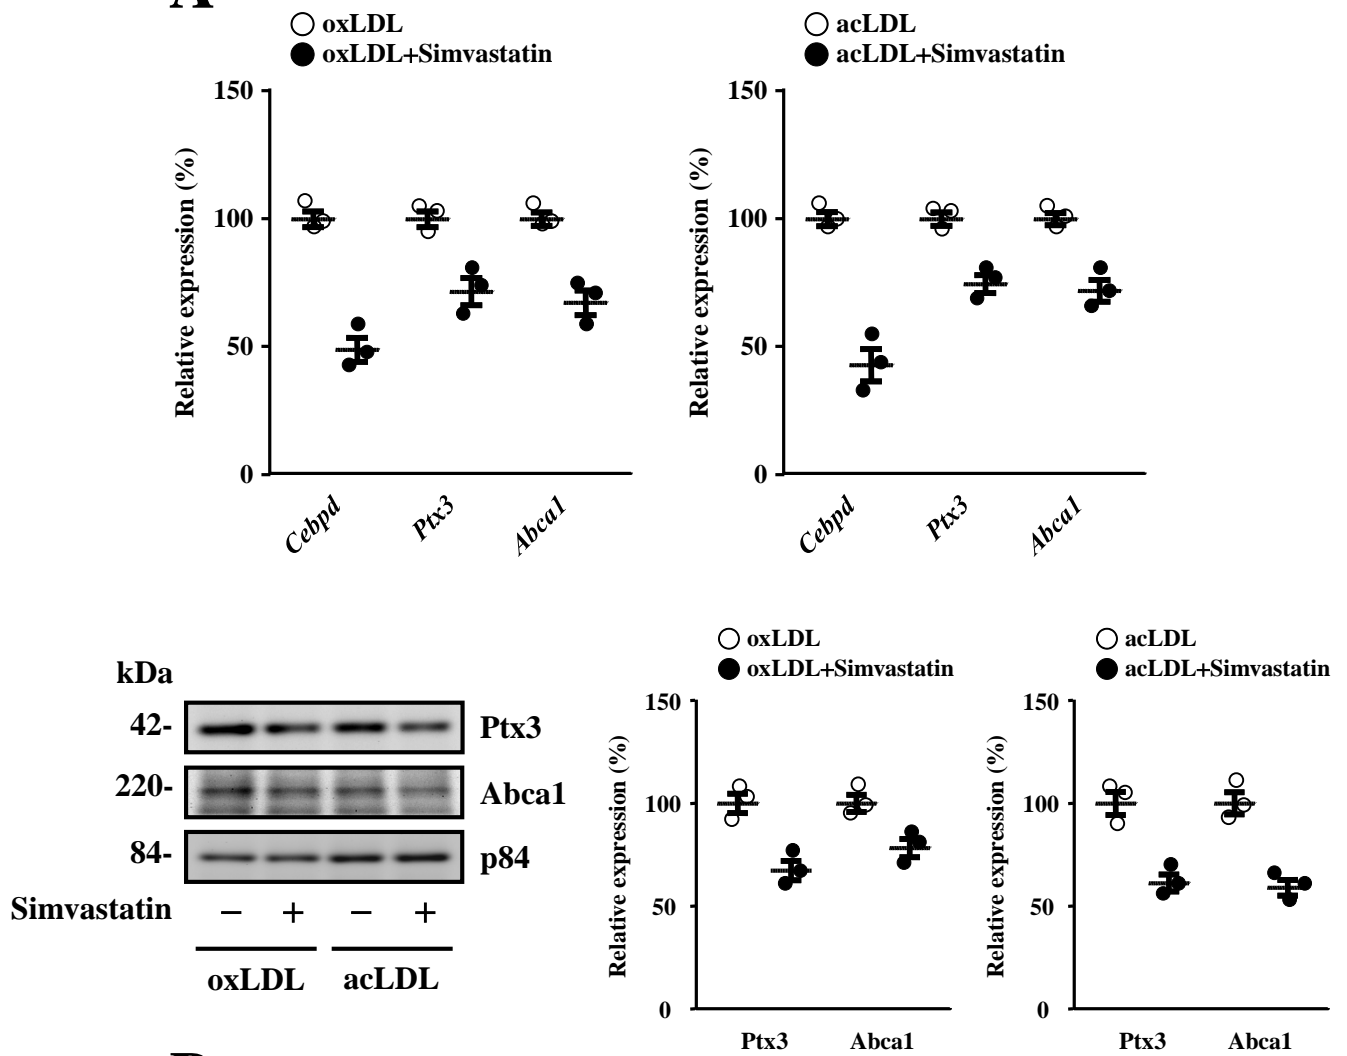**B**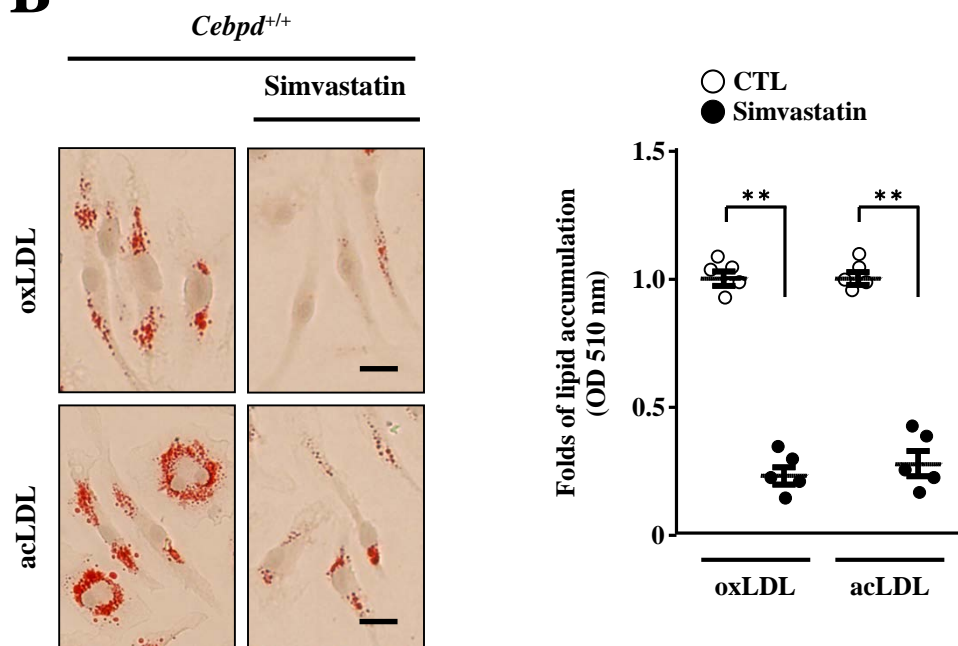**Supplementary Figure 5**

**A**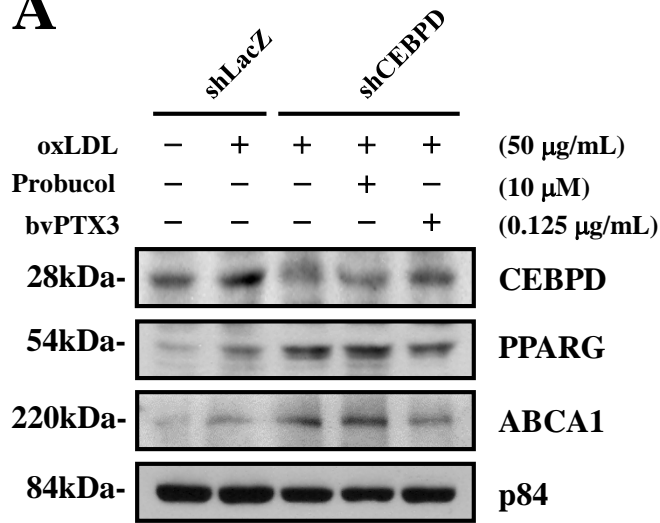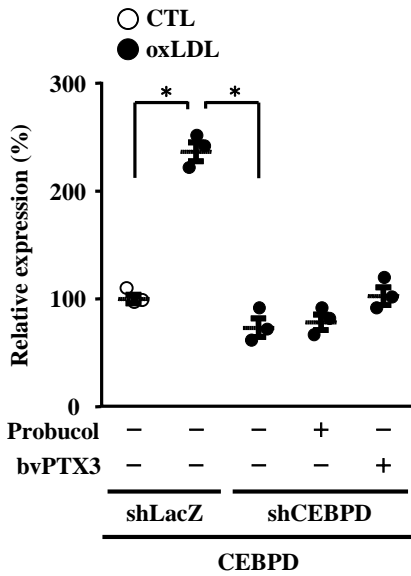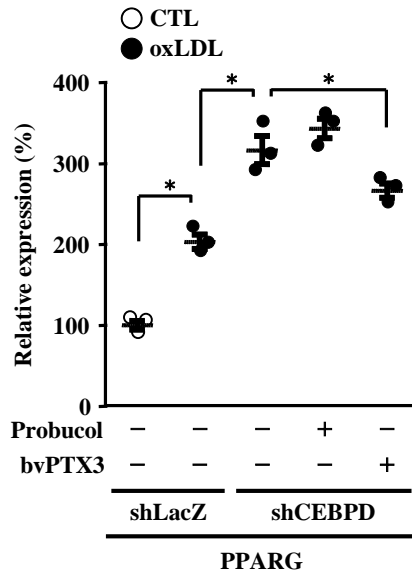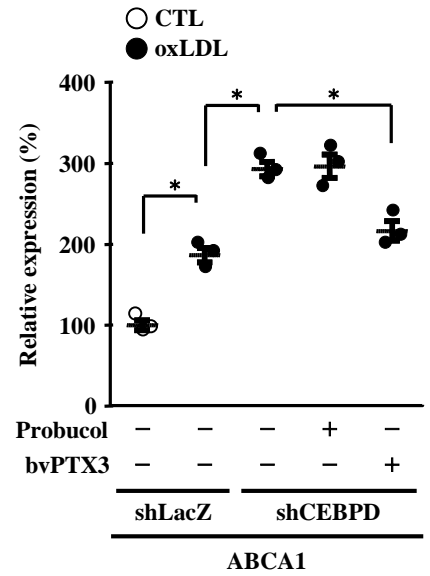**B**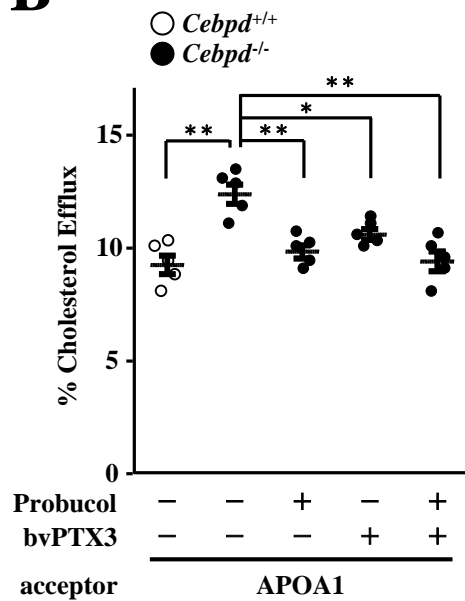**Supplementary Figure 6**
